# Supplementary material
Source: PubMed Central journal article supplement (PMC9387402)
Supplement: NIHMS1789570-supplement-Supplemental_Tables.pdf [file NIHMS1789570-supplement-Supplemental_Tables.pdf]

## Supplemental Table 1. Possible Anesthetic Complications in Adults with EB

### Complication

Post-operative nausea/vomiting

Aspiration

Laryngospasm

Corneal abrasion/ulcer

Intra-oral bullae

Facial bullae

Truncal bullae

Dental damage

---

Abbreviation: EB, epidermolysis bullosa

## Supplemental Table 2. Anesthetic Considerations for Adults with Epidermolysis Bullosa (EB)

| Preoperative                                                                                  | Intraoperative                                                                                                 | Postoperative                 |
|-----------------------------------------------------------------------------------------------|----------------------------------------------------------------------------------------------------------------|-------------------------------|
| Identify EB subtype                                                                           | Educate team about “no-touch” principle                                                                        | Continue “no-touch” principle |
| Review prior anesthetic history                                                               | Avoid all adhesives                                                                                            | Minimize agitation            |
| History and physical examination (cutaneous and extracutaneous manifestations of EB)          | Avoid shear forces                                                                                             | Multi-modal pain control      |
| Medication reconciliation (pain medication, antidepressants, steroids, investigational drugs) | Use EB-modified monitors                                                                                       | Early caregiver presence      |
| Airway assessment                                                                             | Prepare for difficult IV access                                                                                | Assess for complications      |
| Laboratory testing as indicated                                                               | Smooth IV induction                                                                                            |                               |
| Echocardiogram for high-risk subtypes                                                         | Anticipate difficult airway (fiberoptic intubation with small endotracheal tube, consider advanced techniques) |                               |
| Identify potential IV access sites                                                            | Carefully protect eyes                                                                                         |                               |
| Assess regional/neuraxial block landmarks                                                     | Examine patient prior to draping to ensure adequate padding                                                    |                               |
| Patient preference for dressings                                                              | Post-operative nausea/vomiting prophylaxis                                                                     |                               |
|                                                                                               | Smooth emergence and extubation                                                                                |                               |
|                                                                                               | Avoid rolling/sliding during transfer                                                                          |                               |

Abbreviations: EB, epidermolysis bullosa. IV, intravenous.
